# Supplementary material for: MicroRNA panel in serum reveals novel diagnostic biomarkers for prostate cancer
Source: PeerJ. 2021 May 19;9:e11441. doi: 10.7717/peerj.11441 (PMC8141284; doi:10.7717/peerj.11441)
Supplement: Supplemental Information 7 [file peerj-09-11441-s007.xlsx]

## Sheet: serum list
ct-Internal reference	146a-5p	143-3p	15b-3p	200a-3p	24-3p	210-3p	93-5p		3-panel	0.81
	2.23978	1.48017	1.47713	1.36232	1.80636	1.48039	2.21552
	p<0.001				p<0.001		p<0.001
ct-External reference	146a-5p	143-3p	15b-3p	200a-3p	24-3p	210-3p	93-5p		2-panel	0.656
	1.64925	1.10165	1.04441	0.994781	1.47741	1.10181	1.63587
	p<0.001						p=0.001
ct-0.5*(internal reference+external reference）	146a-5p	143-3p	15b-3p	200a-3p	24-3p	210-3p	93-5p		3-panel	0.714
	1.92197	1.27696	1.24207	1.16413	1.63362	1.27715	1.90376
	p<0.001				p<0.001		p<0.001

## Sheet: serum phase 1(28-28)
patient number	146a-5p	24-3p	93-5p
1-18	-3.16667	-4.24833	-1.25
1-22	-1.41667	-0.38	-0.363333
1-67	-2.94833	-2.82333	-1.51667
1-72	-5.45333	-4.94667	-3.83667
1-73	-4.65	-3.30833	-3.1
1-79	-4.56833	-2.20333	-3.67333
1-84	-4.06333	-1.8	-0.963333
1-86	-6.23667	-3.48333	-4.08
1-97	-3	-5.04333	-2.18833
1-109	-3.98667	-2.19	-2.14667
1-110	-4.36	-2.19667	-1.43333
1-123	-5.5	-4.43667	-4.51667
1-129	-3.89833	-2.72333	-4.33667
1-130	-4.27833	-2.91333	-3.76667
1-136	-4.095	-3.38333	-1.88667
1-144	-4.045	-2.85333	-2.24333
69	-2.43667	-3.61667	-0.986667
110	-4.01167	-1.045	-1.24
168	-3.06	-2.36667	-1.25
147	-2.86667	-2.92167	-1.63333
38	-0.23	-3.43833	0.31
83	-2.90333	-1.19333	0.0433333
1-5	-4.64333	-2.61	-0.67
1-50	-5.03333	-1.79	-1.32333
1-28	-2.20667	-1.89333	0.14
1-33	-2.68333	-1.25667	-1.35333
1-149	-3.95667	-2.71667	-3.10667
1-154	-4.685	-2.72	-1.58333
m41	-3.22667	-3.66333	-0.91
m45	-3.74333	-3.34333	-1.80667
m67	-4.005	-2.255	-0.9
m52	-3.25	-2.33	-1.115
m71	-4.37667	-3.02833	-1.57
m72	-3.98333	-1.2	-1.77667
m73	-2.645	-1.44667	-1.21333
m73	-3.47667	-2.63	-1.02
m54	-1.17667	-1.78333	-0.956667
m54	-3.49333	-2.78333	-1.29
m64	-0.211667	-1.11	0.69
m67	-3.405	-0.855	-0.943333
m77	-3.66833	-1.97667	-0.516667
m77	-0.015	-0.865	0.935
m79	-2.91167	-1.36167	0.596667
m85	-4.735	-1.625	-1.19667
56	-3.16333	-2.285	-0.636667
33	-2.375	-1.63667	0.0633333
8	-1.82	-1.63333	0.14
71	-2.92	-2.71333	-1.53333
64	-3.275	-2.66	-1.39667
62	-5.01667	-2.735	-1.62333
53	-3.11333	-2.67667	-1.61333
84	-2.655	-2.72167	-1.91
53	-2.76667	-1.42	-0.646667
59	-2.58667	-1.34333	-0.326667
73	-4.22	-2.53333	-0.54
65	-1.49833	0.25	-0.98
	-3.72798	-2.7322	-1.92696
	-2.99048	-2.01304	-0.857024
	1.66728	1.64623	2.09935

## Sheet: serum phase 2(32-32)
patient number	146a-5p	24-3p	93-5p
44(16.6)	-4.05	-3.17	-2.38667
108(16.6)	-3.76333	-3.62667	-3.43
20(16.6)	-4.27	-3.67667	-2.51
54(17)	-3.79333	-3.98667	-2.79333
66(17)	-2.49333	-3.25333	-1.81667
127(17)	-3.23667	-2.98	-2.63
172(17)	-3.40333	-3.16333	-2.79333
190(17)	-2.44	-3.46333	-2.45
76(17)	-2.75667	-2.05	-2.16667
243(17)	-3.64	-3.57667	-2.85
8(17)	-3.57333	-3.78667	-1.405
266(17)	-3.73333	-4.13	-2.99667
220(17)	-3.82667	-4.22333	-2.55667
19(17)	-3.45	-3.46	-2.22
285(17)	-4.43667	-3.77667	-2.65
17(17)	-3.21667	-3.22333	-0.491667
97	-2.42333	-2.15167	-1.77167
1-61	-2.85167	-2.01667	-1.31667
1-102	-3.03333	-3.64667	-1.62
1-63	-2.87	-3.41	-2.22333
1-43	-3.42	-3.34667	-1.89333
1-65	-3.02	-3.36333	-1.69667
1-3	-2.83667	-3.64667	-1.86333
1-56	-0.913333	-2.36667	0.64
1-66	-3.90667	-3.8	-2.71
1-59	-2.43667	-1.99333	-1.41333
1-100	-1.89333	-2.48167	0.148333
1-103	-2.97667	-2.80333	-1.80667
1-30	-3.01333	-3.99667	-2.03
121	-3.83	-2.82	-1.56
63	-3.70333	-4.14	-1.86
0809205	-4.19	-3.5	-3.18333
0	-1.28	-1.80667	-0.18
68	-2.14667	-2.21333	-0.52
59	-2.67167	-2.44833	-1.24833
70	-1.675	-1.30333	-0.883333
86	-2.60333	-3.00333	-1.85667
74	-2.72	-2.96667	-1.46333
83	-1.20333	-1.90333	-0.686667
48	-1.44333	-1.31667	-0.953333
55	-2.62667	-2.78667	-1.48667
76	-2.61333	-3.08333	-1.52667
53	-2.88	-2.61833	-1.83
42	-2.32	-2.455	-2.03
55	-1.31167	-2.54167	-0.101667
52	-2.00333	-3.54667	-0.33
64	-2.67333	-2.43667	-1.90333
89	0.395	-1.14333	0.995
41	-2.85667	-2.62	-1.09333
46	-2.35333	-2.13667	-0.85
70	-1.40667	-1.90833	-0.06
60	-1.455	-2.68	-0.526667
57	-1.82333	-1.98	-0.636667
79	-0.36	-0.856667	-0.133333
61	-2.47667	-2.40333	-0.746667
54	-2.44333	-2.64333	-1.63
62	-1.36333	-1.83667	-0.836667
58	-1.84333	-2	-0.618333
63	-2.74667	-2.97	-1.84
79	-0.828333	-1.87	1.62667
84	-2.63	-2.13167	-0.64
96	0.095	-2.825	-0.235
61	-1.81667	-2.61667	-0.506667
82	-0.738333	-2.10333	-0.178333
	-3.2313	-3.28219	-2.00958
	-1.83823	-2.28609	-0.778437
	2.62637	1.99459	2.34753

## Sheet: serum phase 3(26-26)
patient number	146a-5p	24-3p	93-5p
1-58	-3.79	-3.92	-2.81667
1-51	-3.20667	-3.44667	-1.56
1-83	-4.105	-4.62833	-3.45833
1-49	-3.45667	-4.36	-2.58
1-53	-3.545	-4.17167	-1.27167
1-48	-2.06	-3.01667	-0.51
1-68	-2.90667	-3.74	-1.58
1-77	-3.08333	-3.47	-1.46
1-50	-0.986667	-1.00333	1.45667
1-60	-1.45833	-1.11167	0.911667
1-69	-2.90667	-2.59	-1.855
1-75	-0.87	-1.795	0.52
102(16.3)	-3.40333	-4.28	-2.04333
181(16.3)	-4.07667	-4.75333	-3.76667
85(16.3)	-3.73667	-3.67	-2.52333
257(16.3)	-2.74	-3.35	-1.33333
108(16.4)	-3.47667	-3.28	-1.91333
76(16.4)	-5.06667	-3.56	-2
136(16.4)	-3.00667	-4.81667	-3.67
20(16.5)	-2.56333	-2.97	-1.52
112(16.5)	-3.675	-3.79833	-2.24833
4(16.5)	-3.43333	-3.28333	-1.6
67(16.6)	-4.485	-4.655	-3.37167
85(16.6)	-4.33	-3.45333	-2.95
0826822	-4.49667	-4.22	-3.66333
133726	-2.32	-7.11667	-1.61333
46	-2.43667	-3.01	-1.80667
41	-2.76	-2.92	-0.916667
53	-3.51667	-3.39333	-2.47667
72	-1.90333	-3.64833	-1.66667
64	-2.06333	-2.48333	-0.386667
69	-2.33	-3.15667	-0.583333
58	-1.80667	-2.23333	-0.44
52	-0.106667	-1.72333	-0.26
61	-2.37667	-1.99	-0.806667
83	-1.67333	-2.94333	-0.736667
74	-1.27333	-2.01333	0.106667
62	-3.11	-2.74333	-1.09667
81	-2.76333	-3.25333	-2.16
61	-3.49333	-2.59	-0.936667
66	-1.995	-2.85	-1.91667
75	-3.22667	-3.23333	-2.27333
63	-2.25	-2.67333	-0.89
50	-2.65	-2.79333	-1.15333
51	-3.33667	-3.02	-2.14667
79	-2.77333	-2.5	-1.50667
52	-1.42833	-2.625	-0.945
8	-1.68667	-2.4	-0.616667
71	-1.84667	-3.05333	-1.29
56	-3.58667	-3.33	-2.23
74	-1.2		1.08333
72	-1.805		0.535
	-3.19942	-3.63308	-1.86231
	-2.28455	-2.77417	-1.05833
	1.8854	1.81367	1.7459

## Sheet: exosomes
146a-5p	24-3p	93-5p
-1.955	-1.37167	-0.145
-1.65	-1.38667	-1.14667
-2.49667	-2.52667	-1.85667
-2.20333	-1.29333	-0.646667
-2.01167	-1.835	-1.115
-2.92667	-2.97333	-1.82333
-2.72667	-2.98	-2.10667
-2.14333	-2.68667	-0.57
-1.11333	-3.09333	-1.355
-1.2	-1.54333	-2.31833
-0.426667	-1.49333	-0.271667
-2.57333	-2.68333	-1.30333
-1.90333	-1.75667	-2.56333
-2.20667	-2.79	-2.07333
-0.906667	-0.863333	0.39
-2.28	-2.22	-1.33667
-2.08333	-2.90667	-2.14333
-1.99	-2.37333	-3.32833
-1.645	-2.335	-2.05
-2.18	-2.81667	-3.59667
-0.403333	-2.23167	-3.83167
-2.56333	-2.39333	-4.56333
-2.06	-2.11333	-2.25667
-1.58333	-1.65	-2.02333
-2.64	-2.88667	-1.11667
-1.77	-1.46667	-0.478333
-2.67	-0.966667	-0.403333
-1.65	-0.82	-1.61667
-0.583333	-1.40333	0.68
-2.43333	-2.41333	-1.02667
-2.19667	-2.34	-1.19
-2.95167	-1.13667	-1.05333
-1.985	-2.865	-0.435
-1.03667	-1.85667	-0.243333
-2.91333	-1.95667	-1.04
-0.618333	-1.08833	-1.38833
-2.11	-2.54333	-1.50667
-0.55	-2.01	-0.168333
-0.978333	-1.30667	-0.973333
-1.16667	-1.55	-2.9
-0.57	-1.95667	-1.045
-0.343333	-1.68333	0.223333
-1.86167	-2.405	-2.00167
0.536667	-0.27	-2.15667
-1.72333	-2.82667	0.15
-1.32333	-2.32333	-0.746667
0.935	-0.263333	-0.11
-0.256667	-0.986667	-4.02667
-1.88465	-2.17986	-1.83479
-1.36917	-1.72187	-1.02389

## Sheet: tissues
146a	T	N		24	T	N		93	T	N
0.6136	4.59667	6.84333		0.873	0.186667	0.42		0.873	4.71	5.09667
	5.88	5.54			0.163333	0.2			4.99667	4.99
	7.91667	6.03333			2.91667	1.06			6.41333	6.52
	8.05	7.86667			1.34333	3.01333			6.72	7.01667
	6.12667	4.53667			1.11667	-1.20333			6.42	4.03
	6.4	5.49			0.18	1.10667			5.35667	5.69667
	7.325	6.96167			2.34333	2.95333			5.9	7.21667
	5.87	5.71667			1.46667	1.46333			3.1	3.70333
	6.16	7.33667			0.416667	0.13			5.71	5.35667
	7.23833	7.30667			1.975	1.22333			6.805	6.04
	6.59	6.75			2.02667	0.576667			5.43	5.76667
	6.27	5.72667			1.29333	1.22833			6.37667	6.8
	6.52333	7.26333			2.53667	1.79667			7.22667	6.33667
	6.79667	6.02333			0.61	0.576667			5.41333	5.12333
	6.74333	5.92667			1.1	-1.11			4.39	4.91667
	7.10667	8.39333			1.39	2.05			6.32667	5.94
	6.07667	7.11667			-0.356667	0.336667			4.08333	4.42
	5.37	5.87333			-0.896667	1.02667			4.59333	5.03
	7.15333	7.24333			1.33333	1.15			6.82333	6.95
	6.28333	5.64333			0.306667	0.52			5.7	5.17667
	7.82333	8.01			2.40333	0.486667			6.94667	5.8
	6.22667	6.79667			0.616667	1.51667			5.92	6.08
	5.83333	6.29667			0.79	1.63			5.10333	5.46
	6.72667	6.73667			0.276667	1.10333			5.05667	6.84
	7	7.24333			1.88333	2.28			4.89333	5.8
	7.78	7.05167			2.23	0.18			6.02333	5.43
	6.84	8.54667			1.13333	1.80333			5.61667	6.52667
	7.59	9.63167			1.79333	1.23			5.73333	5.95
