# Supplementary material for: MicroRNA panel in serum reveals novel diagnostic biomarkers for prostate cancer
Source: PeerJ. 2021 May 19;9:e11441. doi: 10.7717/peerj.11441 (PMC8141284; doi:10.7717/peerj.11441)
Supplement: Supplemental Information 8 [file peerj-09-11441-s008.xlsx]

## Sheet: clinical information
traning stage	patient number	age	Gleason grade	TNM stage	Initial tPSA (ng/ml)	Initial fpsa (ng/ml)	fPSA/tPSA		texting stage	patient number	age	Gleason grade	TNM stage	Initial tPSA (ng/ml)	Initial fpsa (ng/ml)	fPSA/tPSA		external stage	patient number	age	Gleason grade	TNM stage	Initial tPSA (ng/ml)	Initial fpsa (ng/ml)	fPSA/tPSA
	1-18	54	3+2	Ⅰ	1.2	0.487	0.405833			44(16.6)	72	3+2	Ⅰ	0.865	0.14	0.16185			1-51	82	3+3	Ⅰ	12.74	1.12	0.0879121
	1-73	60	3+3	Ⅱ	6.88	0.449	0.0652616			54(17)	70	3+3	Ⅱ	9.71	0.951	0.0979403			1-58	64	3+3	Ⅰ	5.64	0.404	0.0716312
	1-79	61	3+3	Ⅱ	7.43	0.91	0.122476			20(16.6)	71	3+3	Ⅰ	0.386	0.101	0.261658			1-83	75	3+3	Ⅰ	13.79	1.4	0.101523
	1-72	62	3+3	Ⅰ	0.291	0.047	0.161512			172(17)	73	3+3	Ⅱ	100	39.19	0.3919			1-49	77	3+3	Ⅰ	9.32	1.2	0.128755
	1-22	64	3+3	Ⅰ	12.37	0.487	0.0393694			127(17)	80	3+3	Ⅱ	5.91	1.42	0.240271			102(16.3)	75	4+3	IV	15.09	0.316	0.020941
	1-67	69	3+3	Ⅰ	0.134	0.012	0.0895522			66(17)	81	3+3	Ⅱ	19.84	2.65	0.133569			1-69	75	4+3	Ⅲ	104.6	32.96	0.315105
	1-86	58	3+4	Ⅱ	43.32	1.13	0.0260849			108(16.6)	63	3+4	Ⅰ	4.24	0.408	0.0962264			1-77	78	3+4	Ⅱ	44.2	3.01	0.0680995
	1-84	66	3+4	Ⅰ	1.79	0.02	0.0111732			97	70	4+3	IV	49.91	3.43	0.0687237			1-60	80	4+3	Ⅲ	80.53	8.69	0.10791
	1-97	66	3+4	Ⅱ	48.09	1.84	0.0382616			1-61	71	4+3	IV	166.2	21.23	0.127738			1-75	80	3+4	IV	141.6	0.49	0.00346045
	1-110	66	4+3	Ⅲ	154.6	14.73	0.0952781			190(17)	72	3+4	Ⅰ	17.65	0.469	0.0265722			1-50	82	3+4	Ⅲ	49.17	3.43	0.069758
	1-123	66	4+3	Ⅲ	234.2	70.1	0.299317			8(17)	72	3+4	Ⅱ	43.18	2.1	0.0486336			1-53	85	3+4	Ⅰ	56.02	2.04	0.0364156
	1-109	57	3+4	Ⅱ	7.16	0.795	0.111034			285(17)	74	4+3	Ⅲ	2087	64.8	0.0310494			1-48	70	4+3	Ⅱ	4.29	0.03	0.00699301
	110	59	4+4	Ⅲ	41.2	6.23	0.151214			76(17)	59	4+3	Ⅰ	0.507	0.034	0.0670611			1-68	75	4+3	Ⅱ	6.82	0.441	0.0646628
	1-130	59	4+4	Ⅲ	147.7	8.73	0.0591063			243(17)	62	3+4	Ⅰ	0.003	0.01	3.33333			136(16.4)	78	4+4	Ⅲ	138.7	14.14	0.101947
	38	73	4+4	IV	50.81	5.15	0.101358			220(17)	52	4+3	Ⅱ	9.84	1.07	0.10874			85(16.3)	79	4+4	Ⅱ	10.43	0.699	0.0670182
	147	73	4+4	IV	6004	45.68	0.00760826			19(17)	58	4+3	Ⅱ	7.55	1.12	0.148344			181(16.3)	68	4+4	Ⅰ	1.31	0.152	0.116031
	1-129	75	4+4	Ⅱ	5.47	1.96	0.358318			17(17)	66	3+4	Ⅲ	429.5	28.75	0.0669383			133726	55	4+5	IV	9.75	1.36	0.139487
	1-136	75	4+4	Ⅲ	42.3	3.23	0.0763593			266(17)	68	4+3	Ⅱ	21.74	1.15	0.0528979			76(16.4)	68	4+4	Ⅲ	246.6	16.02	0.0649635
	69	79	4+4	Ⅲ	101.4	13.66	0.134714			1-43	62	4+4	Ⅲ	3450	87.9	0.0254783			108(16.4)	71	4+4	Ⅲ	2030	56.6	0.0278818
	1-144	80	4+4	Ⅲ	41.59	5.47	0.131522			1-65	63	5+3	Ⅲ	1231	50	0.0406174			257(16.3)	48	4+4	Ⅱ	7.61	0.65	0.0854139
	83	80	4+4	IV	1199	234.9	0.195913			1-103	64	4+4	IV	22	2.07	0.0940909			20(16.5)	62	4+4	Ⅳ	4.34	0.18	0.0414747
	168	81	5+3	Ⅲ	347.5	67.5	0.194245			1-66	66	4+4	Ⅲ	92.73	19.2	0.207053			112(16.5)	67	4+4	IV	6.63	0.738	0.111312
	1-149	71	5+4	IV	6.39	0.342	0.0535211			1-59	66	4+4	IV	9318	67.42	0.00723546			4(16.5)	66	5+4	Ⅲ	1332	77.8	0.0584084
	1-5	71	5+4	Ⅲ	2068	73.4	0.0354932			1-56	67	4+4	Ⅲ	5.12	0.359	0.0701172			67(16.6)	67	4+5	Ⅲ	45.27	4.13	0.0912304
	1-28	73	5+4	Ⅲ	372.6	68.9	0.184917			121	63	4+5	Ⅲ	246.9	19.04	0.0771162			826822	52	4+5	IV	1.98	0.13	0.0656566
	1-154	75	4+5	IV	4.34	0.434	0.1			1-102	82	4+4	Ⅰ	6.2	0.274	0.0441935			85(16.6)	68	5+4	IV	599.8	36.45	0.0607703
	1-50	75	4+5	Ⅲ	40.37	6.87	0.170176			809205	65	4+5	IV	1.22	0.205	0.168033
	1-33	78	5+4	Ⅲ	103.9	25.49	0.245332			1-3	82	4+4	Ⅲ	344.4	14.8	0.0429733
										1-100	86	4+4	IV	16.69	1.25	0.0748951
										1-63	88	4+4	Ⅲ	3210	17.77	0.00553583
										63	71	4+5	IV	8.21	0.07	0.00852619
										1-30	79	4+5	Ⅱ	8.42	1.07	0.127078
